# Supplementary material
Source: MDPI journal article supplement (https://www.mdpi.com/1999-4907/13/10/1558)
Supplement: s1 [file s1]

**Table S1.** Summary of evaluated morphological and physiological response variables for data analysis.

| Model | Response variable group | Response variable | Error distribution<br>(Power lambda link function) <sup>1</sup> |
|-------|-------------------------|-------------------|-----------------------------------------------------------------|
| II    | Morphology (biomass)    | Roots (<2mm)      | Gaussian (1)                                                    |
|       |                         | LMF               | Gaussian (1)                                                    |
|       |                         | FRMF              | Gaussian (1)                                                    |
|       |                         | R/S ratio         | Gamma (0.182)                                                   |
|       |                         | FR/LB ratio       | Gaussian (1)                                                    |
| III   | Morphology (size)       | Height (H)        | Gaussian (1)                                                    |
|       |                         | Diameter (D)      | Gaussian (1)                                                    |
|       |                         | H/D ratio         | Gaussian (1)                                                    |
| IV    | Physiology              | PN                | Gaussian (1)                                                    |
|       |                         | GS                | Gamma (-0.101)                                                  |
|       |                         | Ci                | Gaussian (1)                                                    |
|       |                         | ETR               | Gamma (0.020)                                                   |
|       |                         | E                 | Gaussian (1)                                                    |
|       |                         | Pn/Gs ratio       | Gaussian (1)                                                    |
|       |                         | Pn/E ratio        | Gaussian (1)                                                    |
|       |                         | Ψ                 | Gamma (-0.062)                                                  |

<sup>1</sup>Power lambda link function [ $g(\lambda) = \lambda^{\lambda}$ ] is the lambda ( $\lambda$ , numeric value inside the brackets) used for the monotonic transformations.

LMF: leaf mass fraction; FRMF: fine-root mass fraction; R/S ratio: root/shoot ratio; FR/LB ratio: fine-root-to-leaf biomass fraction; Height: height of the oak seedling; Diameter: basal diameter of the oak seedling; H/D ratio: height diameter ratio; Pn net photosynthesis; Gs: stomatal conductance; Ci: internal CO<sub>2</sub> concentration; ETR: electron transport rate; E: transpiration; Ψ: leaf water potential.

**Table S2.** Summary of Kaplan–Meier non-parametric models fitted to analyse the main factors—soil treatment and *P.c* infection—affecting the survival of oak seedlings.

| Soil treatment | <i>P.c</i> infection | Time | N. risk | N. event | Survival | SE     | Lower 95% CI | Upper 95% CI |
|----------------|----------------------|------|---------|----------|----------|--------|--------------|--------------|
| 0% BIO         | Control              | 140  | 39      | 1        | 0.974    | 0.0253 | 0.926        | 1            |
|                |                      | 146  | 38      | 1        | 0.949    | 0.0353 | 0.882        | 1            |
|                |                      | 154  | 34      | 2        | 0.893    | 0.0507 | 0.799        | 0.998        |
|                |                      | 160  | 32      | 2        | 0.837    | 0.061  | 0.726        | 0.966        |
|                |                      | 162  | 25      | 2        | 0.77     | 0.0722 | 0.641        | 0.925        |
|                |                      | 166  | 23      | 2        | 0.703    | 0.0799 | 0.563        | 0.879        |
|                |                      | 168  | 18      | 3        | 0.586    | 0.0908 | 0.432        | 0.794        |
|                |                      | 174  | 6       | 2        | 0.391    | 0.128  | 0.206        | 0.743        |
|                | <i>P.c</i>           | 56   | 52      | 1        | 0.981    | 0.019  | 0.944        | 1            |
|                |                      | 76   | 51      | 2        | 0.942    | 0.0323 | 0.881        | 1            |
|                |                      | 83   | 49      | 1        | 0.923    | 0.037  | 0.853        | 0.998        |
|                |                      | 89   | 48      | 3        | 0.865    | 0.0473 | 0.777        | 0.963        |
|                |                      | 105  | 45      | 2        | 0.827    | 0.0525 | 0.73         | 0.936        |
|                |                      | 112  | 43      | 3        | 0.769    | 0.0584 | 0.663        | 0.893        |
|                |                      | 119  | 40      | 3        | 0.712    | 0.0628 | 0.598        | 0.846        |
|                |                      | 133  | 37      | 3        | 0.654    | 0.066  | 0.537        | 0.797        |
|                |                      | 140  | 32      | 2        | 0.613    | 0.0679 | 0.493        | 0.762        |
|                |                      | 147  | 27      | 2        | 0.568    | 0.07   | 0.446        | 0.723        |
|                |                      | 155  | 24      | 1        | 0.544    | 0.071  | 0.421        | 0.703        |
|                |                      | 162  | 20      | 1        | 0.517    | 0.0725 | 0.393        | 0.68         |
|                |                      | 166  | 19      | 1        | 0.49     | 0.0736 | 0.365        | 0.657        |
|                |                      | 174  | 7       | 1        | 0.42     | 0.0904 | 0.275        | 0.64         |
|                | Control              | 104  | 54      | 1        | 0.981    | 0.0183 | 0.946        | 1            |
|                |                      | 127  | 53      | 1        | 0.963    | 0.0257 | 0.914        | 1            |
|                |                      | 140  | 52      | 2        | 0.926    | 0.0356 | 0.859        | 0.998        |
|                |                      | 146  | 50      | 1        | 0.907    | 0.0394 | 0.833        | 0.988        |
|                |                      | 147  | 47      | 1        | 0.888    | 0.0431 | 0.808        | 0.977        |
|                |                      | 160  | 41      | 3        | 0.823    | 0.0538 | 0.724        | 0.936        |
|                |                      | 162  | 32      | 4        | 0.72     | 0.0673 | 0.6          | 0.865        |
|                |                      | 168  | 24      | 4        | 0.6      | 0.0784 | 0.465        | 0.775        |
| 12.5% BIO      | <i>P.c</i>           | 70   | 56      | 1        | 0.982    | 0.0177 | 0.948        | 1            |
|                |                      | 74   | 55      | 1        | 0.964    | 0.0248 | 0.917        | 1            |
|                |                      | 83   | 54      | 2        | 0.929    | 0.0344 | 0.864        | 0.999        |
|                |                      | 89   | 52      | 1        | 0.911    | 0.0381 | 0.839        | 0.989        |
|                |                      | 90   | 51      | 1        | 0.893    | 0.0413 | 0.815        | 0.978        |
|                |                      | 92   | 50      | 2        | 0.857    | 0.0468 | 0.77         | 0.954        |
|                |                      | 96   | 48      | 1        | 0.839    | 0.0491 | 0.748        | 0.941        |
|                |                      | 97   | 47      | 2        | 0.804    | 0.0531 | 0.706        | 0.915        |
|                |                      | 103  | 45      | 1        | 0.786    | 0.0548 | 0.685        | 0.901        |
|                |                      | 105  | 44      | 2        | 0.75     | 0.0579 | 0.645        | 0.872        |
|                |                      | 109  | 42      | 1        | 0.732    | 0.0592 | 0.625        | 0.858        |
|                |                      | 111  | 41      | 4        | 0.661    | 0.0633 | 0.548        | 0.797        |
|                |                      | 119  | 37      | 3        | 0.607    | 0.0653 | 0.492        | 0.75         |
|                |                      | 125  | 34      | 1        | 0.589    | 0.0657 | 0.474        | 0.733        |
|                |                      | 127  | 33      | 1        | 0.571    | 0.0661 | 0.455        | 0.717        |
|                |                      | 133  | 32      | 2        | 0.536    | 0.0666 | 0.42         | 0.684        |
|                |                      | 147  | 28      | 2        | 0.497    | 0.0672 | 0.382        | 0.648        |

|  |            |     |    |   |       |        |       |       |
|--|------------|-----|----|---|-------|--------|-------|-------|
|  |            | 154 | 22 | 1 | 0.475 | 0.0678 | 0.359 | 0.628 |
|  |            | 168 | 15 | 3 | 0.38  | 0.0731 | 0.26  | 0.554 |
|  |            | 105 | 54 | 1 | 0.981 | 0.0183 | 0.946 | 1     |
|  |            | 123 | 50 | 1 | 0.962 | 0.0265 | 0.911 | 1     |
|  |            | 127 | 47 | 1 | 0.941 | 0.0329 | 0.879 | 1     |
|  |            | 139 | 46 | 1 | 0.921 | 0.038  | 0.849 | 0.999 |
|  |            | 140 | 44 | 1 | 0.9   | 0.0425 | 0.82  | 0.987 |
|  | Control    | 146 | 43 | 1 | 0.879 | 0.0464 | 0.793 | 0.975 |
|  |            | 147 | 38 | 2 | 0.833 | 0.0543 | 0.733 | 0.946 |
|  |            | 154 | 33 | 3 | 0.757 | 0.0646 | 0.641 | 0.895 |
|  |            | 162 | 22 | 3 | 0.654 | 0.0786 | 0.517 | 0.828 |
|  |            | 168 | 17 | 3 | 0.538 | 0.0886 | 0.39  | 0.743 |
|  |            | 174 | 8  | 2 | 0.404 | 0.1059 | 0.242 | 0.675 |
|  |            | 62  | 57 | 1 | 0.982 | 0.0174 | 0.949 | 1     |
|  |            | 78  | 56 | 1 | 0.965 | 0.0244 | 0.918 | 1     |
|  |            | 82  | 55 | 1 | 0.947 | 0.0296 | 0.891 | 1     |
|  |            | 83  | 54 | 1 | 0.93  | 0.0338 | 0.866 | 0.999 |
|  |            | 89  | 53 | 1 | 0.912 | 0.0375 | 0.842 | 0.989 |
|  |            | 90  | 52 | 1 | 0.895 | 0.0406 | 0.819 | 0.978 |
|  |            | 103 | 51 | 1 | 0.877 | 0.0435 | 0.796 | 0.967 |
|  |            | 104 | 50 | 1 | 0.86  | 0.046  | 0.774 | 0.955 |
|  |            | 105 | 49 | 1 | 0.842 | 0.0483 | 0.753 | 0.942 |
|  | <i>P.c</i> | 106 | 48 | 1 | 0.825 | 0.0504 | 0.732 | 0.929 |
|  |            | 111 | 47 | 1 | 0.807 | 0.0523 | 0.711 | 0.916 |
|  |            | 112 | 46 | 1 | 0.789 | 0.054  | 0.69  | 0.903 |
|  |            | 119 | 45 | 2 | 0.754 | 0.057  | 0.651 | 0.875 |
|  |            | 127 | 43 | 2 | 0.719 | 0.0595 | 0.612 | 0.846 |
|  |            | 140 | 39 | 1 | 0.701 | 0.0608 | 0.591 | 0.831 |
|  |            | 154 | 32 | 1 | 0.679 | 0.0627 | 0.567 | 0.814 |
|  |            | 160 | 31 | 1 | 0.657 | 0.0644 | 0.542 | 0.796 |
|  |            | 161 | 26 | 1 | 0.632 | 0.0667 | 0.514 | 0.777 |
|  |            | 168 | 22 | 4 | 0.517 | 0.0753 | 0.388 | 0.688 |

Bio 0% = seedlings that received no soil treatment, Bio 12.5% = seedlings that received 12.5% of Biohumim and Bio 25% = seedlings that received 25% of Biohumim. Control = seedlings were not infected by *P. cinnamomi* and *P.c* = seedlings were not infected by *P. cinnamomi*.

**Table S3.** Results of model selection of the generalised linear mixed models fitted to analyse the main factors—soil treatment (S) and biotic stress (B)—affecting different morphological response variables.

| Response variable                   | S | B | S × B | AICc  | deltaAICc |
|-------------------------------------|---|---|-------|-------|-----------|
| Root (<2mm) biomass                 |   |   |       | 25.1  | 0.00      |
|                                     | + |   |       | 29.4  | 4.28      |
|                                     |   | + |       | 31.1  | 5.98      |
|                                     | + | + |       | 35.4  | 10.28     |
|                                     | + | + | +     | 38.8  | 13.67     |
| <i>Importance:</i> 0.05 0.11 <0.01  |   |   |       |       |           |
| Leaf mass fraction                  | + | + | +     | 223.0 | 0.00      |
|                                     |   | + |       | 223.5 | 0.51      |
|                                     | + | + |       | 224.8 | 1.8       |
|                                     |   |   |       | 225.8 | 2.76      |
|                                     | + |   |       | 227.2 | 4.16      |
| <i>Importance:</i> 0.85 0.60 0.39   |   |   |       |       |           |
| Fine roots mass fraction            |   |   |       | 198.6 | 0.00      |
|                                     | + |   |       | 199.5 | 0.93      |
|                                     |   | + |       | 201.7 | 3.11      |
|                                     | + | + |       | 202.6 | 4.01      |
|                                     | + | + | +     | 205.5 | 6.93      |
| <i>Importance:</i> 0.19 0.40 0.02   |   |   |       |       |           |
| Root/Shoot ratio                    | + | + |       | 82.3  | 0.00      |
|                                     | + |   |       | 83.5  | 1.17      |
|                                     | + | + | +     | 83.7  | 1.35      |
|                                     |   |   |       | 87.7  | 5.37      |
|                                     |   | + |       | 87.8  | 5.48      |
| <i>Importance:</i> 0.72 0.94 0.23   |   |   |       |       |           |
| Fine roots/Leaf Biomass ratio       |   |   |       | -3.9  | 0.00      |
|                                     | + |   |       | 0.6   | 4.55      |
|                                     |   | + |       | 6.2   | 10.12     |
|                                     | + | + |       | 10.7  | 14.61     |
|                                     | + | + | +     | 15.3  | 19.23     |
| <i>Importance:</i> <0.01 0.09 <0.01 |   |   |       |       |           |
| Height (H)                          |   | + |       | 367.5 | 0.00      |
|                                     | + | + |       | 369.5 | 2.00      |
|                                     |   |   |       | 370.7 | 3.17      |
|                                     | + | + | +     | 371.3 | 3.79      |
|                                     | + |   |       | 372.7 | 5.17      |
| <i>Importance:</i> 0.84 0.33 0.08   |   |   |       |       |           |
| Basal diameter (D)                  |   |   |       | 180.3 | 0.00      |
|                                     | + |   |       | 182.3 | 1.92      |
|                                     |   | + |       | 185.4 | 5.02      |
|                                     | + | + |       | 187.3 | 6.93      |
|                                     | + | + | +     | 188.0 | 7.63      |
| <i>Importance:</i> 0.09 0.29 0.02   |   |   |       |       |           |
| H/D ratio                           |   | + |       | 191.3 | 0.00      |
|                                     | + | + | +     | 191.4 | 0.14      |
|                                     | + | + |       | 193.6 | 2.28      |
|                                     |   |   |       | 194.3 | 2.97      |
|                                     | + |   |       | 196.2 | 4.93      |

| <i>Importance:</i>                                       | <i>0.88</i> | <i>0.52</i> | <i>0.36</i> |
|----------------------------------------------------------|-------------|-------------|-------------|
| Importance of predictor variable in the model averaging. |             |             |             |
| Maximal model = $T \times B + 1$   Mother tree.          |             |             |             |

**Table S4.** Results of model selection of the generalised linear mixed models fitted to analyse the main factors—soil treatment (S) and biotic stress (B)—affecting different physiological response variables.

| Response variable                     | S | B | S × B | AICc   | deltaAICc |
|---------------------------------------|---|---|-------|--------|-----------|
| Pn                                    |   |   |       | 328.7  | 0.00      |
|                                       | + |   |       | 329.4  | 0.74      |
|                                       |   | + |       | 331.0  | 2.29      |
|                                       | + | + |       | 331.7  | 2.99      |
|                                       | + | + | +     | 333.2  | 4.54      |
| <i>Importance: 0.28 0.44 0.04</i>     |   |   |       |        |           |
| Gs                                    |   |   |       | -125.8 | 0.00      |
|                                       | + |   |       | -124.1 | 1.63      |
|                                       |   | + |       | -124.0 | 1.80      |
|                                       | + | + |       | -122.2 | 3.55      |
|                                       | + | + | +     | -120.2 | 5.62      |
| <i>Importance: 0.31 0.32 0.03</i>     |   |   |       |        |           |
| Ci                                    | + |   |       | 572.6  | 0.00      |
|                                       |   |   |       | 574.2  | 1.60      |
|                                       | + | + |       | 576.2  | 3.69      |
|                                       |   | + |       | 577.9  | 5.30      |
|                                       | + | + | +     | 579.9  | 7.38      |
| <i>Importance: 0.15 0.69 0.01</i>     |   |   |       |        |           |
| ETR                                   |   | + |       | 500.2  | 0.00      |
|                                       | + | + |       | 502.1  | 1.90      |
|                                       | + | + | +     | 504.5  | 4.28      |
|                                       |   |   |       | 506.3  | 6.12      |
|                                       | + |   |       | 508.3  | 8.09      |
| <i>Importance: 0.96 0.33 0.07</i>     |   |   |       |        |           |
| E                                     |   |   |       | 165.7  | 0.00      |
|                                       | + |   |       | 167.7  | 2.05      |
|                                       |   | + |       | 170.0  | 4.28      |
|                                       | + | + |       | 172.1  | 6.39      |
|                                       | + | + | +     | 172.3  | 6.61      |
| <i>Importance: 0.13 0.28 0.02</i>     |   |   |       |        |           |
| Pn/Gs                                 | + |   |       | 515.1  | 0.00      |
|                                       |   |   |       | 516.2  | 1.03      |
|                                       | + | + |       | 518.6  | 3.47      |
|                                       |   | + |       | 519.7  | 4.53      |
|                                       | + | + | +     | 522.4  | 7.29      |
| <i>Importance: 0.16 0.63 0.01</i>     |   |   |       |        |           |
| Pn/E                                  |   |   |       | 178.8  | 0.00      |
|                                       | + |   |       | 180.9  | 2.07      |
|                                       |   | + |       | 183.6  | 4.80      |
|                                       | + | + |       | 185.7  | 6.86      |
|                                       | + | + | +     | 187.8  | 9.01      |
| <i>Importance: 0.09 0.27 &lt;0.01</i> |   |   |       |        |           |
| Ψ                                     | + | + |       | 393.0  | 0.00      |
|                                       | + | + | +     | 395.1  | 2.13      |
|                                       | + |   |       | 396.0  | 2.95      |

|                    |             |             |             |
|--------------------|-------------|-------------|-------------|
|                    | +           | 399.9       | 6.90        |
|                    |             | 402.5       | 9.44        |
| <hr/>              |             |             |             |
| <i>Importance:</i> | <i>0.85</i> | <i>0.97</i> | <i>0.21</i> |
| <hr/>              |             |             |             |

Importance of predictor variable in the model averaging.

Maximal model =  $T \times B + 1$  | Mother tree.

Pn net photosynthesis; Gs: stomatal conductance; Ci: internal CO<sub>2</sub> concentration; ETR: electron transport rate; E: transpiration;  $\Psi$ : leaf water potential.
